# Supplementary material
Source: publisher site journal article supplement (https://www.dovepress.com/article/371707)
Supplement: Supplementary file 1 [file get_supplementary_file.php]

**Table S1:** List of mitochondrial sequence variation analysed for the association with migraine.

| **S. No** | **Locus Contig** | **Locus Position** | **Alleles** | ***p* value** |
| --- | --- | --- | --- | --- |
| 1 | chrM | 57 | ['T', 'TC'] | 0.962622575 |
| 2 | chrM | 58 | ['T', 'C'] | 0.361598148 |
| 3 | chrM | 64 | ['C', 'T'] | 0.611151163 |
| 4 | chrM | 146 | ['T', 'C'] | 0.440587927 |
| 5 | chrM | 150 | ['C', 'T'] | 0.679632296 |
| 6 | chrM | 151 | ['C', 'T'] | 0.347456661 |
| 7 | chrM | 153 | ['A', 'G'] | 0.317796073 |
| 8 | chrM | 184 | ['G', 'A'] | 0.311235045 |
| 9 | chrM | 185 | ['G', 'A'] | 0.311235045 |
| 10 | chrM | 189 | ['A', 'G'] | 0.633272875 |
| 11 | chrM | 198 | ['C', 'T'] | 0.357846018 |
| 12 | chrM | 200 | ['A', 'G'] | 0.344561855 |
| 13 | chrM | 204 | ['T', 'C'] | 0.937026974 |
| 14 | chrM | 207 | ['G', 'A'] | 0.505762058 |
| 15 | chrM | 208 | ['T', 'C'] | 0.395229314 |
| 16 | chrM | 210 | ['A', 'G'] | 0.937026974 |
| 17 | chrM | 217 | ['T', 'C'] | 0.36021287 |
| 18 | chrM | 225 | ['G', 'A'] | 0.317796073 |
| 19 | chrM | 239 | ['T', 'C'] | 0.369283199 |
| 20 | chrM | 247 | ['G', 'A'] | 0.36021287 |
| 21 | chrM | 263 | ['A', 'G'] |  |
| 22 | chrM | 709 | ['G', 'A'] | 0.697171207 |
| 23 | chrM | 750 | ['A', 'G'] |  |
| 24 | chrM | 769 | ['G', 'A'] | 0.111488022 |
| 25 | chrM | 827 | ['A', 'G'] | 0.361598148 |
| 26 | chrM | 980 | ['T', 'C'] | 0.347456661 |
| 27 | chrM | 1007 | ['G', 'A'] | 0.365014688 |
| 28 | chrM | 1018 | ['G', 'A'] | 0.031790059 |
| 29 | chrM | 1438 | ['A', 'G'] |  |
| 30 | chrM | 1598 | ['G', 'A'] | 0.44230182 |
| 31 | chrM | 1664 | ['G', 'A'] | 0.357846018 |
| 32 | chrM | 1703 | ['C', 'T'] | 0.44230182 |
| 33 | chrM | 2639 | ['C', 'T'] | 0.44230182 |
| 34 | chrM | 2706 | ['A', 'G'] | 0.184781264 |
| 35 | chrM | 2789 | ['C', 'T'] | 0.031790059 |
| 36 | chrM | 3010 | ['G', 'A'] | 0.980459329 |
| 37 | chrM | 3290 | ['T', 'C'] | 0.372960249 |
| 38 | chrM | 3395 | ['A', 'G'] | 0.347456661 |
| 39 | chrM | 3421 | ['G', 'A'] | 0.298303044 |
| 40 | chrM | 3480 | ['A', 'G'] | 0.37931916 |
| 41 | chrM | 3531 | ['G', 'A'] | 0.372960249 |
| 42 | chrM | 3533 | ['C', 'T'] | 0.361598148 |
| 43 | chrM | 3537 | ['A', 'G'] | 0.317796073 |
| 44 | chrM | 3594 | ['C', 'T'] | 0.031790059 |
| 45 | chrM | 3633 | ['T', 'C'] | 0.347456661 |
| 46 | chrM | 3720 | ['A', 'G'] | 0.36021287 |
| 47 | chrM | 3741 | ['C', 'T'] | 0.347456661 |
| 48 | chrM | 3828 | ['A', 'G'] | 0.36021287 |
| 49 | chrM | 3834 | ['G', 'A'] | 0.372960249 |
| 50 | chrM | 3847 | ['T', 'C'] | 0.611151163 |
| 51 | chrM | 3915 | ['G', 'A'] | 0.372645597 |
| 52 | chrM | 3921 | ['C', 'A'] | 0.44230182 |
| 53 | chrM | 4541 | ['G', 'A'] | 0.357846018 |
| 54 | chrM | 4904 | ['C', 'T'] | 0.358222869 |
| 55 | chrM | 4917 | ['A', 'G'] | 0.864124165 |
| 56 | chrM | 4960 | ['C', 'T'] | 0.44230182 |
| 57 | chrM | 5196 | ['T', 'C'] | 0.031790059 |
| 58 | chrM | 5979 | ['G', 'A'] | 0.36021287 |
| 59 | chrM | 5981 | ['T', 'C'] | 0.184503066 |
| 60 | chrM | 5999 | ['T', 'C'] | 0.372960249 |
| 61 | chrM | 6045 | ['C', 'T'] | 0.36021287 |
| 62 | chrM | 6152 | ['T', 'C'] | 0.36021287 |
| 63 | chrM | 6221 | ['T', 'C'] | 0.317796073 |
| 64 | chrM | 6366 | ['G', 'A'] | 0.36222056 |
| 65 | chrM | 6371 | ['C', 'T'] | 0.317796073 |
| 66 | chrM | 6386 | ['C', 'T'] | 0.372960249 |
| 67 | chrM | 6827 | ['T', 'C'] | 0.357846018 |
| 68 | chrM | 7028 | ['C', 'T'] | 0.184781264 |
| 69 | chrM | 7175 | ['T', 'C'] | 0.031790059 |
| 70 | chrM | 7256 | ['C', 'T'] | 0.031790059 |
| 71 | chrM | 7274 | ['C', 'T'] | 0.031790059 |
| 72 | chrM | 7771 | ['A', 'G'] | 0.031790059 |
| 73 | chrM | 7789 | ['G', 'A'] | 0.365014688 |
| 74 | chrM | 7853 | ['G', 'A'] | 0.365014688 |
| 75 | chrM | 7963 | ['A', 'G'] | 0.365014688 |
| 76 | chrM | 8014 | ['A', 'T'] | 0.298303044 |
| 77 | chrM | 8137 | ['C', 'T'] | 0.347456661 |
| 78 | chrM | 8152 | ['G', 'A'] | 0.010229008 |
| 79 | chrM | 8206 | ['G', 'A'] | 0.031790059 |
| 80 | chrM | 8222 | ['T', 'C'] | 0.937026974 |
| 81 | chrM | 8251 | ['G', 'A'] | 0.44230182 |
| 82 | chrM | 9055 | ['G', 'A'] | 0.37931916 |
| 83 | chrM | 9061 | ['C', 'T'] | 0.357846018 |
| 84 | chrM | 9090 | ['T', 'G'] | 0.358222869 |
| 85 | chrM | 9116 | ['T', 'C'] | 0.328139593 |
| 86 | chrM | 9139 | ['G', 'A'] | 0.357846018 |
| 87 | chrM | 9221 | ['A', 'G'] | 0.031790059 |
| 88 | chrM | 9335 | ['C', 'T'] | 0.44230182 |
| 89 | chrM | 9380 | ['G', 'A'] | 0.369283199 |
| 90 | chrM | 9389 | ['A', 'G'] | 0.328139593 |
| 91 | chrM | 9419 | ['C', 'T'] | 0.361598148 |
| 92 | chrM | 9530 | ['T', 'C'] | 0.031790059 |
| 93 | chrM | 9540 | ['T', 'C'] | 0.706455427 |
| 94 | chrM | 9698 | ['T', 'C'] | 0.37931916 |
| 95 | chrM | 9716 | ['T', 'C'] | 0.37931916 |
| 96 | chrM | 10115 | ['T', 'C'] | 0.031790059 |
| 97 | chrM | 10142 | ['C', 'T'] | 0.347456661 |
| 98 | chrM | 10217 | ['A', 'G'] | 0.010229008 |
| 99 | chrM | 10238 | ['T', 'C'] | 0.690196095 |
| 100 | chrM | 11251 | ['A', 'G'] | 0.884502079 |
| 101 | chrM | 11253 | ['T', 'C'] | 0.369283199 |
| 102 | chrM | 11299 | ['T', 'C'] | 0.37931916 |
| 103 | chrM | 11348 | ['C', 'T'] | 0.37931916 |
| 104 | chrM | 11353 | ['T', 'C'] | 0.347456661 |
| 105 | chrM | 11362 | ['A', 'G'] | 0.44230182 |
| 106 | chrM | 11386 | ['T', 'C'] | 0.031790059 |
| 107 | chrM | 11437 | ['T', 'C'] | 0.937026974 |
| 108 | chrM | 11467 | ['A', 'G'] | 0.041917867 |
| 109 | chrM | 11761 | ['C', 'T'] | 0.361598148 |
| 110 | chrM | 11812 | ['A', 'G'] | 0.864124165 |
| 111 | chrM | 11914 | ['G', 'A'] | 0.633272875 |
| 112 | chrM | 11929 | ['T', 'C'] | 0.328139593 |
| 113 | chrM | 11944 | ['T', 'C'] | 0.031790059 |
| 114 | chrM | 12007 | ['G', 'A'] | 0.706455427 |
| 115 | chrM | 12783 | ['T', 'C'] | 0.358222869 |
| 116 | chrM | 12819 | ['A', 'G'] | 0.864124165 |
| 117 | chrM | 12822 | ['A', 'G'] | 0.44230182 |
| 118 | chrM | 12834 | ['A', 'G'] | 0.010229008 |
| 119 | chrM | 12864 | ['T', 'C'] | 0.368057858 |
| 120 | chrM | 12880 | ['T', 'C'] | 0.372960249 |
| 121 | chrM | 12892 | ['T', 'C'] | 0.298303044 |
| 122 | chrM | 13020 | ['T', 'C'] | 0.36021287 |
| 123 | chrM | 13135 | ['G', 'A'] | 0.010229008 |
| 124 | chrM | 13182 | ['T', 'C'] | 0.36021287 |
| 125 | chrM | 13188 | ['C', 'T'] | 0.611151163 |
| 126 | chrM | 13368 | ['G', 'A'] | 0.864124165 |
| 127 | chrM | 13392 | ['T', 'C'] | 0.365014688 |
| 128 | chrM | 13395 | ['A', 'G'] | 0.031790059 |
| 129 | chrM | 13500 | ['T', 'C'] | 0.347456661 |
| 130 | chrM | 13590 | ['G', 'A'] | 0.031790059 |
| 131 | chrM | 13637 | ['A', 'G'] | 0.329491263 |
| 132 | chrM | 13650 | ['C', 'T'] | 0.031790059 |
| 133 | chrM | 13708 | ['G', 'A'] | 0.980459329 |
| 134 | chrM | 13734 | ['T', 'C'] | 0.36021287 |
| 135 | chrM | 13780 | ['A', 'G'] | 0.937026974 |
| 136 | chrM | 13803 | ['A', 'G'] | 0.031790059 |
| 137 | chrM | 13866 | ['A', 'G'] | 0.395229314 |
| 138 | chrM | 13934 | ['C', 'T'] | 0.031790059 |
| 139 | chrM | 13966 | ['A', 'G'] | 0.317796073 |
| 140 | chrM | 14007 | ['A', 'G'] | 0.36021287 |
| 141 | chrM | 14094 | ['T', 'C'] | 0.372960249 |
| 142 | chrM | 14783 | ['T', 'C'] | 0.357846018 |
| 143 | chrM | 14798 | ['T', 'C'] | 0.37931916 |
| 144 | chrM | 14905 | ['G', 'A'] | 0.864124165 |
| 145 | chrM | 15043 | ['G', 'A'] | 0.357846018 |
| 146 | chrM | 15218 | ['A', 'G'] | 0.945062137 |
| 147 | chrM | 15301 | ['G', 'A'] | 0.706455427 |
| 148 | chrM | 15317 | ['G', 'A'] | 0.010229008 |
| 149 | chrM | 15326 | ['A', 'G'] |  |
| 150 | chrM | 15433 | ['C', 'T'] | 0.001032668 |
| 151 | chrM | 15452 | ['C', 'A'] | 0.884502079 |
| 152 | chrM | 15607 | ['A', 'G'] | 0.864124165 |
| 153 | chrM | 15674 | ['T', 'C'] | 0.962622575 |
| 154 | chrM | 15718 | ['T', 'C'] | 0.372960249 |
| 155 | chrM | 16067 | ['C', 'T'] | 0.278261835 |
| 156 | chrM | 16069 | ['C', 'T'] | 0.932885086 |
| 157 | chrM | 16086 | ['T', 'C'] | 0.726203161 |
| 158 | chrM | 16111 | ['C', 'T'] | 0.368057858 |
| 159 | chrM | 16174 | ['C', 'T'] | 0.420907801 |
| 160 | chrM | 16183 | ['A', 'C'] | 0.70717965 |
| 161 | chrM | 16189 | ['T', 'C'] | 0.952940408 |
| 162 | chrM | 16192 | ['C', 'T'] | 0.311235045 |
| 163 | chrM | 16193 | ['C', 'T'] | 0.365014688 |
| 164 | chrM | 16201 | ['C', 'T'] | 0.937026974 |
| 165 | chrM | 16209 | ['T', 'C'] | 0.031790059 |
| 166 | chrM | 16213 | ['G', 'A'] | 0.37931916 |
| 167 | chrM | 16220 | ['A', 'G'] | 0.001032668 |
| 168 | chrM | 16222 | ['C', 'T'] | 0.344561855 |
| 169 | chrM | 16224 | ['T', 'C'] | 0.37931916 |
| 170 | chrM | 16261 | ['C', 'T'] | 0.344561855 |
| 171 | chrM | 16265 | ['A', 'G'] | 0.937026974 |
| 172 | chrM | 16278 | ['C', 'T'] | 0.620478159 |
| 173 | chrM | 16291 | ['C', 'T'] | 0.311235045 |
| 174 | chrM | 16292 | ['C', 'T'] | 0.311235045 |
| 175 | chrM | 16294 | ['C', 'T'] | 0.875212342 |
| 176 | chrM | 16296 | ['C', 'T'] | 0.593094403 |
| 177 | chrM | 16300 | ['A', 'G'] | 0.959634826 |
| 178 | chrM | 16301 | ['C', 'T'] | 0.026533734 |
| 179 | chrM | 16304 | ['T', 'C'] | 0.36222056 |
| 180 | chrM | 16309 | ['A', 'G'] | 0.176585626 |
| 181 | chrM | 16311 | ['T', 'C'] | 0.209606019 |
| 182 | chrM | 16318 | ['A', 'T'] | 0.347456661 |
| 183 | chrM | 16325 | ['T', 'C'] | 0.368057858 |
| 184 | chrM | 16344 | ['C', 'T'] | 0.317796073 |
| 185 | chrM | 16354 | ['C', 'T'] | 0.031790059 |
| 186 | chrM | 16355 | ['C', 'T'] | 0.361598148 |
| 187 | chrM | 16390 | ['G', 'A'] | 0.831975708 |
| 188 | chrM | 16482 | ['A', 'G'] | 0.369283199 |
| 189 | chrM | 16527 | ['C', 'T'] | 0.358222869 |
